# Supplementary material for: Genetic polymorphisms and transcription profiles associated with intracranial aneurysm: a key role for NOTCH3
Source: publisher site journal article supplement (doi:10.18632/aging.102111), 2019-07-23
Supplement: Supplementary file [file aging-v11i14-102111-supplementary-material-SD2.pdf]

## SUPPLEMENTARY TABLES

Please browse Full Text version to see the data of:

### Supplementary Table 1. DEGs between IA and healthy cerebral artery.

### Supplementary Table 2. Rs779314594, rs200504060, rs2285981 in sporadic IA cases and control subjects

| SNP         | Mutant type | Wild type | F_A      | IA group |      |      | Control group |      |      | OR                      | P    | BONF |
|-------------|-------------|-----------|----------|----------|------|------|---------------|------|------|-------------------------|------|------|
|             | A1          | A2        |          | A1A1     | A1A2 | A2A2 | A1A1          | A1A2 | A2A2 |                         |      |      |
| rs779314594 | -           | C         | 0        | 0        | 0    | 527  | 0             | 0    | 572  | -                       | 1    | 1    |
| rs200504060 | A           | G         | 0.0158   | 0        | 17   | 520  | 0             | 13   | 572  | 1.44<br>(0.69–<br>2.99) | 0.33 | 0.99 |
| rs2285981   | T           | C         | 0.005217 | 0        | 6    | 569  | 0             | 13   | 580  | 0.47<br>(0.18–<br>1.25) | 0.13 | 0.39 |

Note: A1 and A2 are allelic genes, A1 is the mutant type, A2 is wild type. F\_A, Frequency of this allele in IA group.

Abbreviations: SNP, single nucleotide polymorphism; IA, intracranial aneurysm; BONF, Bonferroni single-step adjusted P-values.

Please browse Full Text version to see the data of:

### Supplementary Table 3. IA sample and cerebral artery sample of GEO.

### Supplementary Table 4. KASP primers and probes.

|                     | rs200504060                   | rs2285981                     | rs779314594               |
|---------------------|-------------------------------|-------------------------------|---------------------------|
| FAM-labelled primer | GGTGCCATTGTGTAGGCACCG         | GTGTCCTGGACAGTCGTCCAC         | ATCAACCCAGTGGGCCCC<br>G   |
| HEX-labelled primer | AGGTGCCATTGTGTAGGCACCA        | GTGTCCTGGACAGTCGTCCAT         | GATCAACCCAGTGGGCCCC<br>CA |
| universal primer    | GGTGCTCTGCGAGATTAATGAG<br>GAT | CTGCTAGGGTTTGAGGGTCAGAAT<br>T | AGCAGAGGCCCCAGGCCG<br>T   |

### Supplementary Table 5. Clinical data of IA samples and CA samples.

| Sample      | Age | Sex    | location | Genotype    |             |           |
|-------------|-----|--------|----------|-------------|-------------|-----------|
|             |     |        |          | rs779314594 | rs200504060 | rs2285981 |
| IA sample 1 | 53  | Female | AcoA     | CC          | GG          | CC        |
| IA sample 2 | 60  | Male   | MCA      | CC          | GG          | CC        |
| IA sample 3 | 69  | Male   | MCA      | CC          | GG          | CC        |
| CA sample 1 | 68  | Female | MCA      | CC          | GG          | CC        |
| CA sample 2 | 73  | Male   | MCA      | CC          | GG          | CC        |
| CA sample 2 | 65  | Female | MCA      | CC          | GG          | CC        |

**Supplementary Table 6. Primers of IA-related factors tested in HUVEC.**

---

|                        |                         |
|------------------------|-------------------------|
| H-IL-1beta_F-132       | ATGATGGCTTATTACAGTGGCAA |
| H-IL-1beta_R-132       | GTCGGAGATTCGTAGCTGGA    |
| H-IL6_F-149            | ACTCACCTCTTCAGAACGAATTG |
| H-IL6_F-149            | CCATCTTTGGAAGGTTCAAGTTG |
| H-MCP-1_F-190          | CAGCCAGATGCAATCAATGCC   |
| H-MCP-1_F-190          | TGGAATCCTGAACCCACTTCT   |
| H-TNF- $\alpha$ _F-220 | CCTCTCTCTAATCAGCCCTCTG  |
| H-TNF- $\alpha$ _R-220 | GAGGACCTGGGAGTAGATGAG   |
| H-MMP-2_F-90           | TACAGGATCATTGGCTACACACC |
| H-MMP-2_R-90           | GGTCACATCGCTCCAGACT     |
| H-MMP-9_F-97           | TGTACCGCTATGGTTACTCTG   |
| H-MMP-9_R-97           | GGCAGGGACAGTTGCTTCT     |
| H-NF- $\kappa$ B_F-104 | AACAGAGAGGATTTTCGTTTCCG |
| H-NF- $\kappa$ B_R-104 | TTTGACCTGAGGGTAAGACTTCT |
| H-VCAM1_F-89           | GGGAAGATGGTCGTGATCCTT   |
| H-VCAM1_R-89           | TCTGGGGTGGTCTCGATTTTA   |
| NOTCH3_F-122           | CGTGGCTTCTTTCTACTGTGC   |
| NOTCH3_R-122           | CGTTCACCGGATTTGTGTAC    |

---
